# Supplementary material for: Crossmodal interference on counting performance: Evidence for shared attentional resources
Source: PLoS One. 2023 Nov 10;18(11):e0294057. doi: 10.1371/journal.pone.0294057 (PMC10637692; doi:10.1371/journal.pone.0294057)
Supplement: S1 Data — (XLSX) [file pone.0294057.s001.xlsx]

## Sheet: Foglio1
Matricola	Age	Gender	H Sleep	136	137	146	147	156	157	236	237	246	247	256	257	Accuracy media 2 domanda	Media totale discostamento
				V iso basel Mod	V iso basel FA	V iso sinc Mod	V iso sinc FA	V iso async Mod	V iso async FA	V niso basel Mod	V niso basel FA	V niso sinc Mod	V niso sinc FA	V niso async Mod	V niso async FA
17902	20	f	9	3	-0.333333	0	1.66667	-0.666667	-2	-0.666667	-0.666667	3.33333	1.66667	-3.33333	-3	1	-0.0833333
17789	21	f	7	-0.333333	-5	0	-6.66667	-3.66667	-11.3333	0.333333	-3.33333	0.333333	-3.66667	0	-4	1	-3.11111
17469	22	f	6	3.33333	0.666667	1.33333	6.66667	0.333333	2	1.33333	1.33333	1.66667	2.66667	4.66667	1	1	2.25
17917	21	f	8	-0.666667	-2.33333	-3.66667	-1	-2	-3.33333	-1.33333	-3.33333	0.666667	-5.33333	-1	-4.66667	1	-2.33333
18119	20	f	6	0	-6	0.333333	-1	1.33333	-3	-1.66667	-2.33333	0.333333	-1	-0.333333	-2	1	-1.27778
18143	20	f	6	5	1.66667	2.33333	2.66667	7	0.333333	3	1	3	-2.33333	2	-3.33333	1	1.86111
18028	21	f	7	-3.66667	0	0	1.33333	-4	-3.66667	0.333333	1.33333	3.33333	-3	0.666667	-1.66667	0.918919	-0.75
17858	20	f	7	-0.333333	0.333333	0	0	1	1.33333	0.333333	1.66667	1.66667	1	1	0.333333	1	0.694444
18088	20	m	8	0	-0.333333	0	0	0	2.33333	-0.333333	0	1	1.66667	3	-0.333333	0.972973	0.583333
18178	20	f	6	-1.66667	-4.33333	0	-2	-3.66667	-6.33333	1	-4	-1.33333	-5.66667	-1	-4.66667	0.972973	-2.80556
16933	23	f	7	0	-3	-2.66667	-1.66667	-0.666667	-6	-2.33333	-1.66667	0.666667	-3.66667	-0.333333	-3.66667	0.945946	-2.08333
18174	20	f	8	2.33333	-0.666667	0	0.666667	2	-2.33333	3.66667	-2	0.333333	1	-1.66667	-2.33333	1	0.0833333
18096	23	m	6	0	-0.666667	1.33333	0	0	-3	0	1	0.333333	1.66667	0.666667	0.666667	1	0.166667
17831	20	f	7	-1.33333	-3.66667	0.333333	-0.666667	-4	-6	-1.66667	-8.66667	1	-4.33333	-5	-9	1	-3.58333
18124	20	f	7	0.666667	-6	1.33333	-0.333333	-0.666667	-7.66667	3	-1.33	3.67	-0.67	4	-8	1	-0.999722
18022	19	f	8	0	-0.333333	0	0	0	-4.66667	0.333333	-0.333333	3	2.33333	-1	1.33333	0.972973	0.0555556
17983	19	f	8	-1	-4.33333	0.333333	-0.333333	-3.66667	-10	-1	-5.66667	-0.666667	-4	-1	-10	1	-3.44444
17977	20	f	8	0	-2	0	-2	-1.33333	-3.66667	-3.66667	-3.33333	-1.33333	-5	0.666667	-15.6667	0.972973	-3.11111
18080	20	f	10	-0.333333	-1	0	0	-0.666667	0.666667	-0.666667	-4.66667	-1	-5	-3.33333	-7.33333	0.972973	-1.94444
17908	23	f	7	-1.66667	-0.333333	0	-2.33333	-4.66667	-15.3333	-9.66667	-15.3333	-1	-23.3333	-11	-8	0.972973	-7.72222
18133	20	m	8	1	3.66667	1.33333	0.666667	-10.6667	-2	-1	-1.33333	0.666667	-0.333333	2	-1.33333	1	-0.611111
18162	22	f	8	-6.66667	-1.66667	-3	-1.66667	-5	-3	0.666667	0.666667	0	0	-0.333333	0.666667	0.972973	-1.61111
18106	20	f	8	-0.666667	-2	0	-2	-1.66667	-6	-1.66667	-7	-1.33333	-7.33333	-3.66667	-7.66667	1	-3.41667
17891	21	f	7	0.666667	-1	0	2	-0.666667	-0.666667	0.666667	0	4	0.666667	-1	-1.33333	0.918919	0.277778
18436	20	f	7	0	0.67	0	-0.33	1.67	-2	0.33	-2	1.33	-0.67	0.33	-1	1	-0.139167
18446	20	f	8	0	-4.33	-0.67	-4	-0.67	-9.67	-1.33	-2.33	4	-8.67	1.33	-4.67	0.972973	-2.58417
18003	20	f	8	0	-0.33	0	0	-3.67	-6.67	0	-3.33	2	-3.66	-4.66	-7.67	1	-2.3325
17859	20	m	8	0	-3	-0.33	-3	2	-4.33	3	2	1	-1	1	-2	0.972973	-0.388333
18061	20	f	7	-0.33	-1.67	0	-1.33	-2.67	-4.67	0.67	-1.67	1.33	-0.67	0	-2	1	-1.08417
18413	21	f	8	1	-2.67	-3	-5.67	0	-0.67	-1	-3.67	0	-1.33	-0.67	0.33	0.918919	-1.44583
18122		f		0	2.6	0	1	-0.33	1.33	0.33	3.67	0.67	-1.33	2.67	-1.33	1	0.790769
17957	20	f	8	0	0	0	1.33	1.67	1	1.33	1	5.33	1.33	2.67	-0.33	1	1.25615
17537	21	f	8	-1.67	-3.33	0.33	-0.67	-0.33	-3.67	-1	-4.67	-1	-3.33	-3.33	-6.33	1	-2.15385
18052	21	m	8	0	-0.33	0	0	0	-3	0.33	0	0.67	1	0	0.67	0.945946	0.0219958
18259	21	f	9	1.33	-0.33	-0.33	-1.33	0.67	-4	-1	0	-2	-5.67	-2.33	-3	0.97	-1.30923
17045	22	f	8	0.33	-2.33	-0.67	-2.33	-4	-4.33	2	-1	0.67	-4.67	1.33	-7	1	-1.61538
17932	19	f	9	0.33	-0.33	3.33	0.33	0.67	1.33	4.33	-2.33	1.33	-1	1.67	-0.33	1	0.794615
18086	20	f	9	-1	-1.67	0.33	0	1.67	-1.67	-1	-3.33	-2	-4.67	-4	-3.33	0.97	-1.51538
17892	19	f	8	-2.33	-2.67	3	0	-3.33	-6	1.33	-1	1	1.33	-4.33	-4.33	1	-1.25615
18013	21	f	8	-1	-5.67	-1	-1	-5.33	-8	-0.33	-1.67	0.67	-1.67	-0.67	-1.67	1	-2.02615
17880	20	f	3	-0.33	-5.33	-0.33	-4	-3.67	-8.33	-4	-11	-5.33	-8.67	-5	-10.67	1	-5.05077
18427	24	f	1	-1	-9	0.33	-1.33	-5.33	-9.33	-0.33	-5	-0.67	-8	-5.67	-9.67	1	-4.15385
17951	21	f	6	0.33	-5	-0.33	-3.67	-2.33	-4.33	2.67	-3.33	1.67	-1	3.33	-2	1	-0.999231
18449	20	f	7	0.33	-2	-0.33	-6	-1.67	-3.67	1	-1.67	2.67	-6	1.67	-0.67	1	-1.18
16303	29	f	8	0.67	-6	-1.67	-2.33	-2.67	-7	-3	-9	-3.67	-6.67	-7.33	-8	0.97	-4.28462
18257	21	f	8	0.33	3	0.33	1.67	1.67	6	5.33	2.33	6.33	0	4.67	1.33	1	2.61462
18147	20	f	8	0	2.33	1	0.67	0.67	0	0.33	1.67	1.33	4.33	4.33	1	1	1.43538
18145	20	f	8	1	0.67	0.33	-0.33	0	0.67	1.33	1	0.67	1.33	2.33	0.67	0.97	0.818462
17457	21	f	7	0	2.67	2	2.33	1.33	0.33	3.33	-4.67	2.33	-0.67	6.67	1	0.97	1.35538
18073	21	f	7	-0.67	0	0.67	0.33	-1.33	0.33	0.67	-1	2.67	0.33	1.67	-1.33	1	0.256923
18159	20	f	6	0	-1	0.666667	-0.333333	-1	-4.66667	0	-2	0	-5	-2.66667	-5.33333	0.918919	-1.57034
18063	20	f	6	0	0.333333	0	-6.33333	-1.66667	-8.33333	2	-12	4	-7.66667	-4	1.66667	1	-2.38462
17950	20	f	7	0	-0.333333	0.333333	-0.333333	0	-1.33333	0.333333	1	0	0.333333	-2.66667	-0.333333	1	-0.153846
18138	20	m	7	0.666667	-1	2	0.666667	-1.33333	-2.66667	3	0.333333	0.333333	-1.66667	5.66667	3	1	0.769231
17945	20	f	6	0	3.66667	0.333333	-0.333333	1	-2.33333	3.33333	0.666667	1	-0.666667	0	0.333333	1	0.615385
18261	20	m	8	0	1	-0.333333	0	0	0.333333	2	0.666667	2	1.33333	-1	1	0.972973	0.613306
18401	21	f	7	0	0.333333	0	0	0.333333	-2.66667	0	-1	0.333333	-0.333333	-1.66667	-1	0.891892	-0.36729
18067	19	f	8	0	-0.666667	0	0.333333	0	-3	0	0	1.33333	1.33333	1.33333	0	1	0.128205
17969	20	m	8	0	-2.33333	0	0.333333	0	-2.33333	1.33333	-1	1.66667	-0.666667	-0.666667	-3.33333	0.72973	-0.482328
17882	19	f	5	0.666667	2.33333	0.333333	0	1.66667	0.666667	0.666667	1	1	-0.333333	1.33333	0.666667	0.972973	0.844075
17436	24	m	8	0	0.666667	0.333333	-0.666667	0	-2	1.33333	-1.66667	-0.666667	-2.66667	0	-3.33333	1	-0.589744
18120	20	f	5	0.333333	2	0	0.666667	0.666667	-0.333333	3	0.666667	3	-1.33333	0.333333	-5	0.972973	0.382536
17840	20	f	7	2.33333	2.33333	0	0	2.66667	5.66667	0.666667	-0.333333	1	0.666667	2	-2.33333	1	1.20513
18109	21	f	7	0	-0.666667	0	-0.333333	0	-2.66667	1.33333	-1.33333	0.666667	-0.333333	0	-2	1	-0.333333
18112	21	m	7	4.66667	-0.666667	0	0.333333	2.66667	-2.66667	-0.666667	2.33333	0.666667	-0.333333	1	-1.33333	0.972973	0.536383
18107	21	f	9	0.333333	1	1.66667	-1.66667	3	-1.33333	-1	-3.66667	1.33333	-1	-4	-1.66667	0.972973	-0.463617
17876	21	f	7	3.33333	-0.333333	0	-0.666667	1.66667	-3.33333	-0.333333	0.333333	1.33333	1.33333	1.33333	-1	1	0.358974
18115	22	f		-0.666667	-1	0	0	0.666667	0	3	3	1.66667	-1	2.66667	-1.33333	1	0.615385
18027	21	f	8	-0.333333	-1.33333	0.666667	0	0.666667	-3.66667	0	-2.33333	2.33333	-0.666667	2	-4.66667	0.972973	-0.489258
17943	21	f	8	0.333333	-0.333333	-0.333333	-1	-0.333333	0.666667	2	-2.66667	5	-1.33333	-0.333333	-0.333333	1	0.179487
18432	25	f	8	-0.333333	-5.33333	0	-3	-3	-8	-2.66667	-6.33333	-2.33333	-7	-4.66667	-9.33333	1	-3.92308
17981	21	f	9	-0.333333	-0.666667	-0.666667	0.333333	-3.66667	-2.33333	-1.66667	-6	-1	-6.33333	-3.66667	-5	1	-2.30769
17909	21	f	7	-2.33333	-1.33333	-0.666667	-5.33333	-2.33333	-8.66667	-3.66667	-9.66667	-2.33333	-4.66667	-5	-9.66667	1	-4.20513
18158	21	f	7	-0.666667	-1	1	1.33333	3	-2.66667	2.33333	6.66667	4.66667	7.66667	4	-5	1	1.71795
18034	20	f	7	0.333333	-4	0	-4.33333	-4.66667	-7	0.666667	-2	-2	-5	0.333333	-6.66667	1	-2.5641
17846	19	f	7	0	-3.33333	0	-1.66667	-5	-8	0	-2.33333	-0.333333	-5	-2	-5.33333	1	-2.46154
18126	20	f	6	-4	-6.33333	-0.333333	-3.66667	-3.66667	-6	-2.33333	-5	-3.66667	-7.33333	-4.66667	-9.66667	0.945946	-4.28621
18372	20	f	7	-1	-0.333333	0	5.66667	-4	-7	-3.33333	-3	-1	-1.66667	-7.33333	-6.66667	0.918919	-2.21137
17345	21	m	8	-2.66667	-1.66667	0.666667	-1.66667	-1	4	-2.33333	1.66667	-0.666667	-1.66667	-3.33333	1.33333	1	-0.487179
